# Supplementary material for: Early anthropoid femora reveal divergent adaptive trajectories in catarrhine hind-limb evolution
Source: Springer Nature journal article supplement (doi:10.1038/s41467-019-12742-0), 2019-11-08
Supplement: 41467_2019_12742_MOESM4_ESM.pdf [file 41467_2019_12742_MOESM4_ESM.pdf]

## **Description of Additional Supplementary Files**

File Name: Supplementary Data 1

Description: tree1 European apes as stem great apes. Nexus file.

File Name: Supplementary Data 2

Description: tree2 European apes as stem hominines. Nexus file.

File Name: Supplementary Data 3

Description: tree3 European apes as stem pongines. Nexus file.
